# Supplementary material
Source: publisher figshare collection journal article supplement (https://acs.figshare.com/ndownloader/files/4091827)
Supplement: Supplementary file 1 [file 4091827]

# Identification of Novel Androgen Receptor Antagonists Using Structure- and Ligand-based Methods

*Huifang Li, Xin Ren, Eric Leblanc, Kate Frewin, Paul S. Rennie and Artem Cherkasov*

## **Content:**

*Supplementary Figure S1. Structures of steroids and current non-steroidal anti-androgens. Red color marks the common substructure of the compounds that is responsible for the AR HBS target binding.*

*Supplementary Figure S2. Structures of 37 selected compounds from the structure- and ligand-based virtual screening for biological testing*

***Supplementary Table S1.** ROC AUC of different methods based on different number of descriptors*

***Supplementary Table S2.** Descriptors and their corresponding meanings*

Figure S1

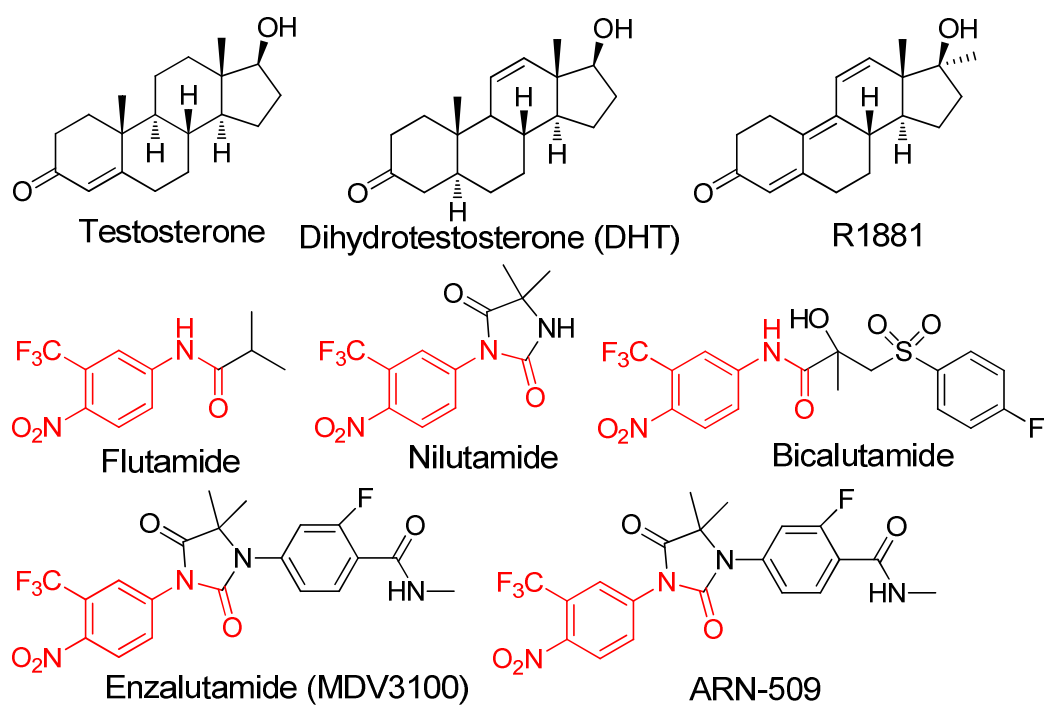

Figure S2

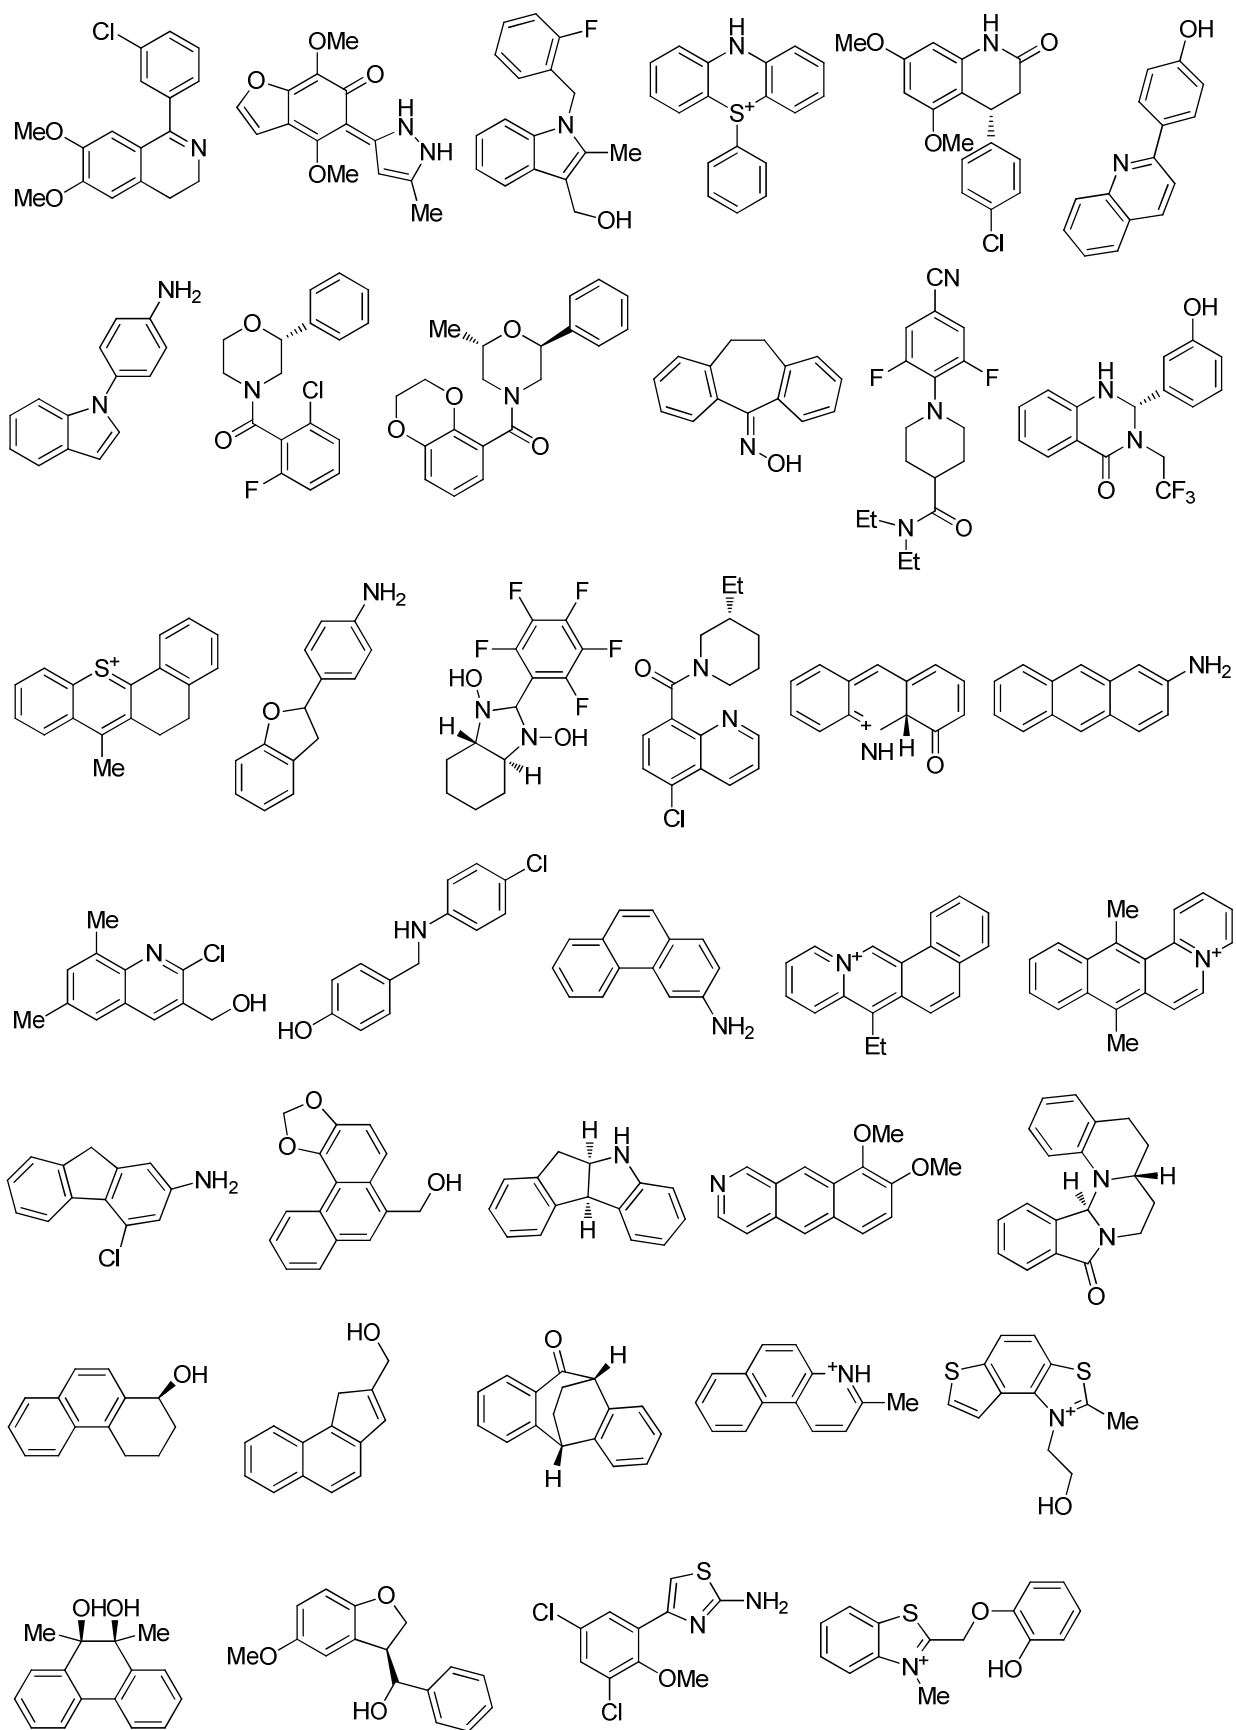

**Table S1.** ROC AUC of different methods based on different number of descriptors

| Desc. No. | ADTree | ANN   | Bagging | Decorate | kNN   | K-star | Lazy-IB1 | Logitboost | RandomForest |
|-----------|--------|-------|---------|----------|-------|--------|----------|------------|--------------|
| 15        | 0.705  | 0.731 | 0.787   | 0.785    | 0.788 | 0.783  | 0.711    | 0.777      | 0.784        |
| 16        | 0.702  | 0.712 | 0.781   | 0.787    | 0.787 | 0.779  | 0.718    | 0.782      | 0.799        |
| 17        | 0.710  | 0.73  | 0.797   | 0.789    | 0.793 | 0.785  | 0.717    | 0.778      | 0.802        |
| 18        | 0.695  | 0.745 | 0.800   | 0.792    | 0.8   | 0.794  | 0.722    | 0.790      | 0.810        |
| 19        | 0.699  | 0.746 | 0.804   | 0.799    | 0.798 | 0.790  | 0.713    | 0.776      | 0.809        |
| 20        | 0.703  | 0.746 | 0.808   | 0.777    | 0.801 | 0.793  | 0.716    | 0.781      | 0.806        |
| 21        | 0.700  | 0.767 | 0.806   | 0.776    | 0.804 | 0.796  | 0.715    | 0.787      | 0.802        |
| 22        | 0.705  | 0.759 | 0.807   | 0.784    | 0.806 | 0.798  | 0.72     | 0.794      | 0.804        |
| 23        | 0.716  | 0.747 | 0.814   | 0.802    | 0.802 | 0.805  | 0.717    | 0.791      | 0.814        |
| 24        | 0.722  | 0.769 | 0.813   | 0.812    | 0.806 | 0.807  | 0.716    | 0.804      | 0.812        |
| 25        | 0.715  | 0.737 | 0.811   | 0.808    | 0.804 | 0.809  | 0.716    | 0.807      | 0.822        |
| 26        | 0.717  | 0.736 | 0.807   | 0.813    | 0.812 | 0.807  | 0.712    | 0.795      | 0.816        |
| 27        | 0.710  | 0.754 | 0.823   | 0.793    | 0.805 | 0.807  | 0.72     | 0.807      | 0.824        |
| 28        | 0.712  | 0.767 | 0.822   | 0.796    | 0.801 | 0.808  | 0.711    | 0.795      | 0.817        |
| 29        | 0.721  | 0.75  | 0.818   | 0.800    | 0.803 | 0.809  | 0.713    | 0.796      | 0.813        |
| 30        | 0.724  | 0.752 | 0.818   | 0.805    | 0.803 | 0.809  | 0.715    | 0.802      | 0.815        |
| best      | 0.724  | 0.769 | 0.823   | 0.813    | 0.812 | 0.809  | 0.722    | 0.807      | 0.824        |

**Table S2.** Descriptors and their corresponding meanings

| Symbol                  | Definition                                                                    | Class                      |
|-------------------------|-------------------------------------------------------------------------------|----------------------------|
| <b>a_nN</b>             | Number of nitrogen atoms                                                      | 2D                         |
| <b>ARR</b>              | aromatic ratio                                                                | constitutional descriptors |
| <b>Average_Softness</b> | Arithmetic mean of softnesses of all atoms of a molecule                      | IND                        |
| <b>b_double</b>         | Number of double bonds. Aromatic bonds are not considered to be double bonds. | 2D                         |
| <b>B02[N-O]</b>         | presence/absence of N - O at topological distance 02                          | 2D binary fingerprints     |

|                      |                                                                     |                            |
|----------------------|---------------------------------------------------------------------|----------------------------|
| <b>B02[O-O]</b>      | presence/absence of O - O at topological distance 02                | 2D binary fingerprints     |
| <b>B09[C-O]</b>      | presence/absence of C - O at topological distance 09                | 2D binary fingerprints     |
| <b>BCUT_SLOGP_0</b>  | LogP BCUT (0/3)                                                     | 2D                         |
| <b>BCUT_SMR_0</b>    | Molar Refractivity BCUT (0/3)                                       | 2D                         |
| <b>EEig09r</b>       | Eigenvalue 09 from edge adj. matrix weighted by resonance integrals | edge adjacency indices     |
| <b>ESpm08d</b>       | Spectral moment 08 from edge adj. matrix weighted by dipole moments | edge adjacency indices     |
| <b>F04[C-C]</b>      | frequency of C - C at topological distance 04                       | 2D binary fingerprints     |
| <b>F05[O-F]</b>      | frequency of O - F at topological distance 05                       | 2D binary fingerprints     |
| <b>GCUT_SLOGP_3</b>  | logP GCUT (3/3)                                                     | 2D                         |
| <b>Kier2</b>         | Second kappa shape index                                            | 2D                         |
| <b>MSD</b>           | mean square distance index (Balaban)                                | topological descriptors    |
| <b>nCb-</b>          | number of substituted benzene C(sp <sup>2</sup> )                   | functional group counts    |
| <b>nCconj</b>        | number of non-aromatic conjugated C(sp <sup>2</sup> )               | functional group counts    |
| <b>nDB</b>           | number of double bonds                                              | constitutional descriptors |
| <b>PCR</b>           | ratio of multiple path count over path count                        | walk and path counts       |
| <b>PEOE_VSA_PNEG</b> | Total polar negative VDW surface area                               | 2D                         |
| <b>R7u</b>           | R autocorrelation of lag 7 / unweighted                             | GETAWAY descriptors        |
| <b>SlogP</b>         | Log Octanol/Water Partition Coefficient                             | 2D                         |
| <b>SMR</b>           | Molar Refractivity                                                  | 2D                         |
| <b>SRW05</b>         | self-returning walk count of order 05                               | walk and path counts       |
| <b>std_dim1</b>      | Standard dimension 1                                                | i3D                        |
| <b>Sum_Hardness</b>  | Sum of hardnesses of atoms of a molecule                            | IND                        |
| <b>vsurf_A</b>       | Ampiphilic moment                                                   | i3D                        |
| <b>vsurf_CW1</b>     | Capacity factor at -0.2                                             | i3D                        |
| <b>vsurf_IW6</b>     | Hydrophilic integy moment at -4.0                                   | i3D                        |
